# Supplementary material for: The Peripheral Immune Landscape in a Patient with Myocarditis after the Administration of BNT162b2 mRNA Vaccine
Source: PubMed Central journal article supplement — Mol Cells. 2022 Jul 28;45(10):738–48. doi: 10.14348/molcells.2022.0031 (PMC9589374; doi:10.14348/molcells.2022.0031), 2022-07-28
Supplement: molce-45-10-738-supple1.pdf [file molce-45-10-738-supple1.pdf]

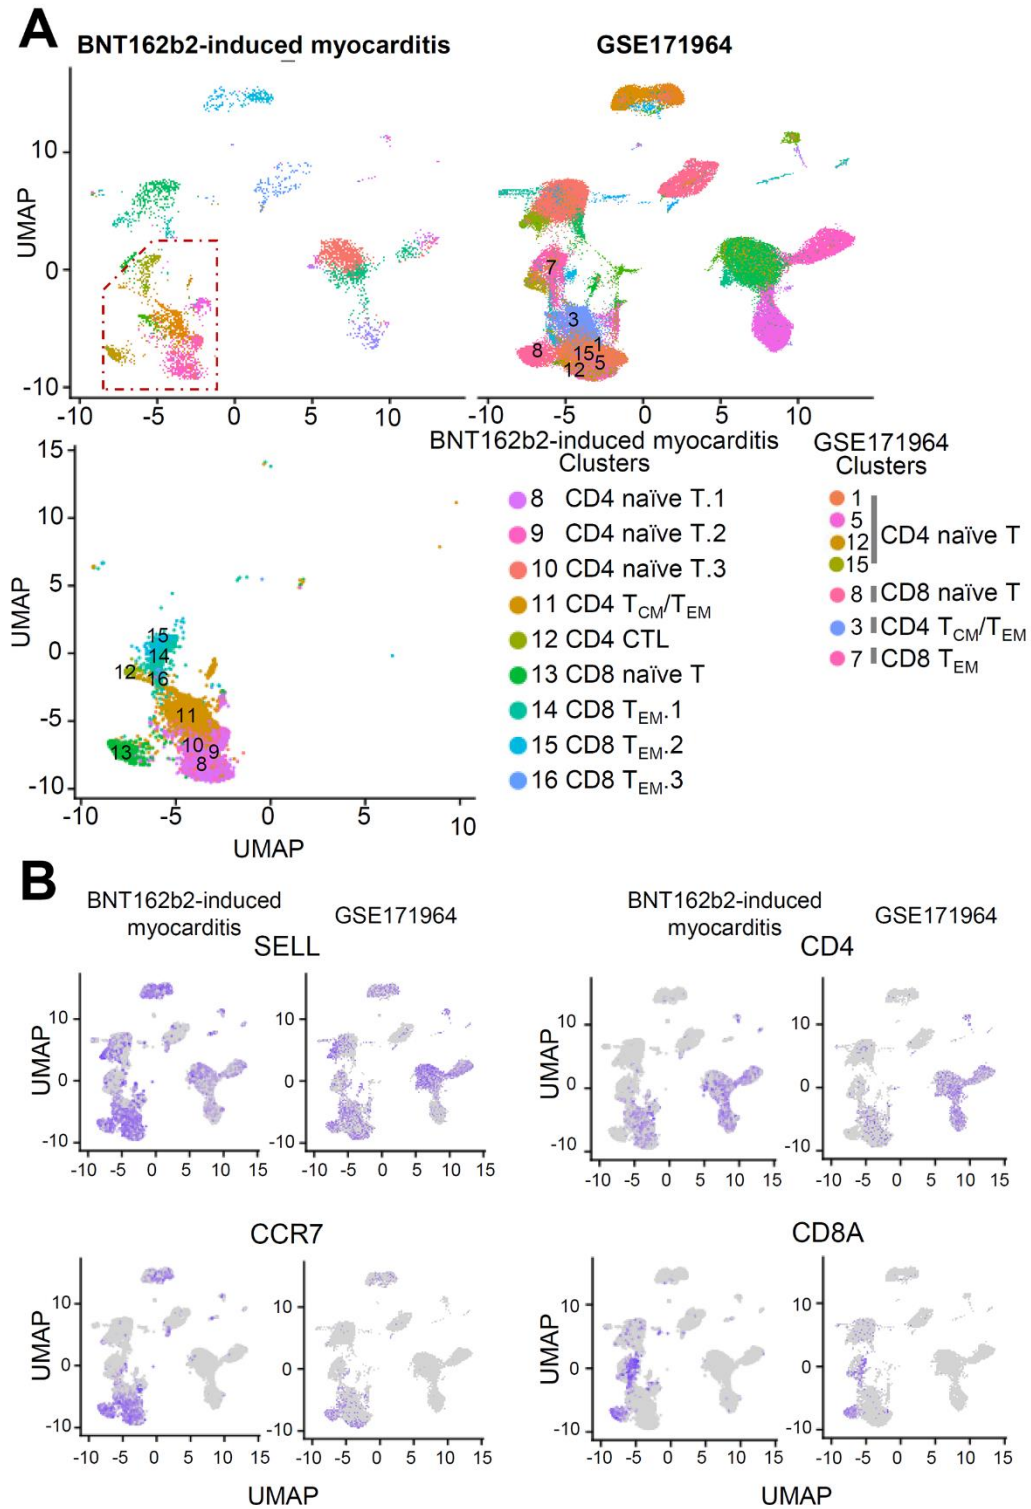

**Supplementary Fig. S1. T cell subpopulations of PBMCs of vaccinated individuals and BNT162b2-induced myocarditis patient.** (A) T cell clusters of GSE171964 are identified after integration with BNT162b2-induced myocarditis data. (B) Feature plot showing distribution of T cell markers.

**A**

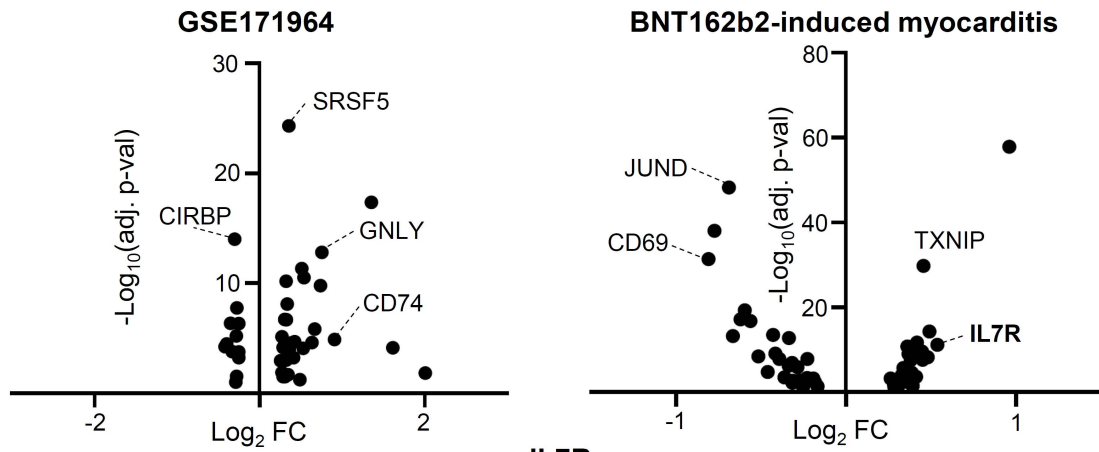

**B**

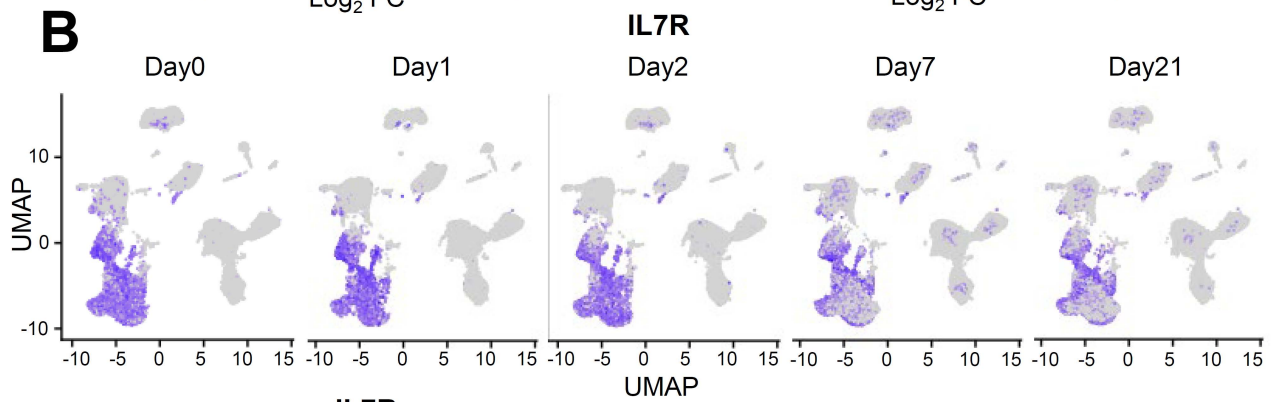

**C**

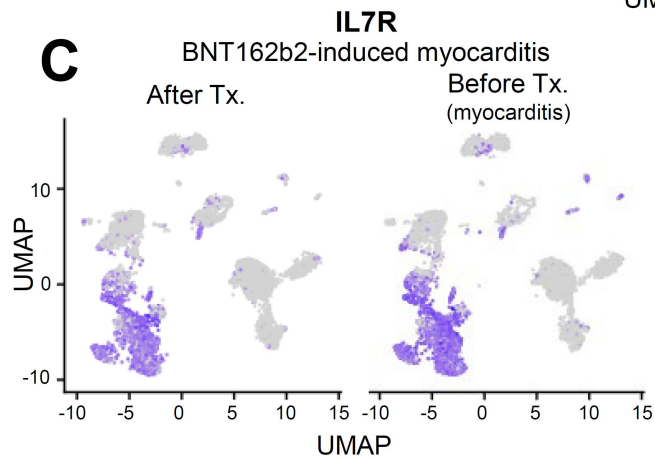

**Supplementary Fig. S2. Up-regulation of IL7R mRNA expression level in BNT162b20-induced myocarditis patient.** (A) Volcano plot of differentially expressed genes with adjusted  $P$  value less than 0.1. (B) Feature plot showing IL7R distribution in GSE171964. (C) Feature plot showing IL7R distribution in this data.
